# Supplementary material for: The role of lattice oxygen in CO oxidation over Ce18O2-based catalysts revealed under operando conditions
Source: Royal Society of Chemistry journal article supplement (doi:10.1039/c5cy00842e), 2015-01-01
Supplement: c5cy00842e1.pdf [file c5cy00842e1.pdf]

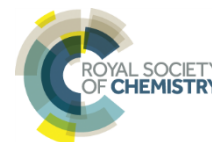

## Catalysis Science & Technology

### ARTICLE

#### Supplementary Information For

### Role of Lattice Oxygen on CO Oxidation Over $\text{Ce}^{18}\text{O}_2$ -Based Catalyst Revealed Under Operando Conditions.

Bartosz Penkala <sup>a,b</sup>, Daniel Aubert<sup>b</sup>, Helena Kaper<sup>b</sup>, Caroline Tardivat<sup>b</sup>, Kazimierz Conder<sup>c</sup> and Werner Paulus<sup>a</sup>.

<sup>a</sup>University of Montpellier, Institut Charles Gerhardt, UMR 5253, C2M, 5 Place Eugene Bataillon, F-34095, Montpellier, France

<sup>b</sup>Ceramic Synthesis and Functionalization Laboratory, Saint-Gobain CREE, 550 av. Alphonse Jauffret, F-84306, Cavaillon, France

<sup>c</sup>Laboratory for Developments and Methods, PSI, CH-5232 Villigen, Switzerland

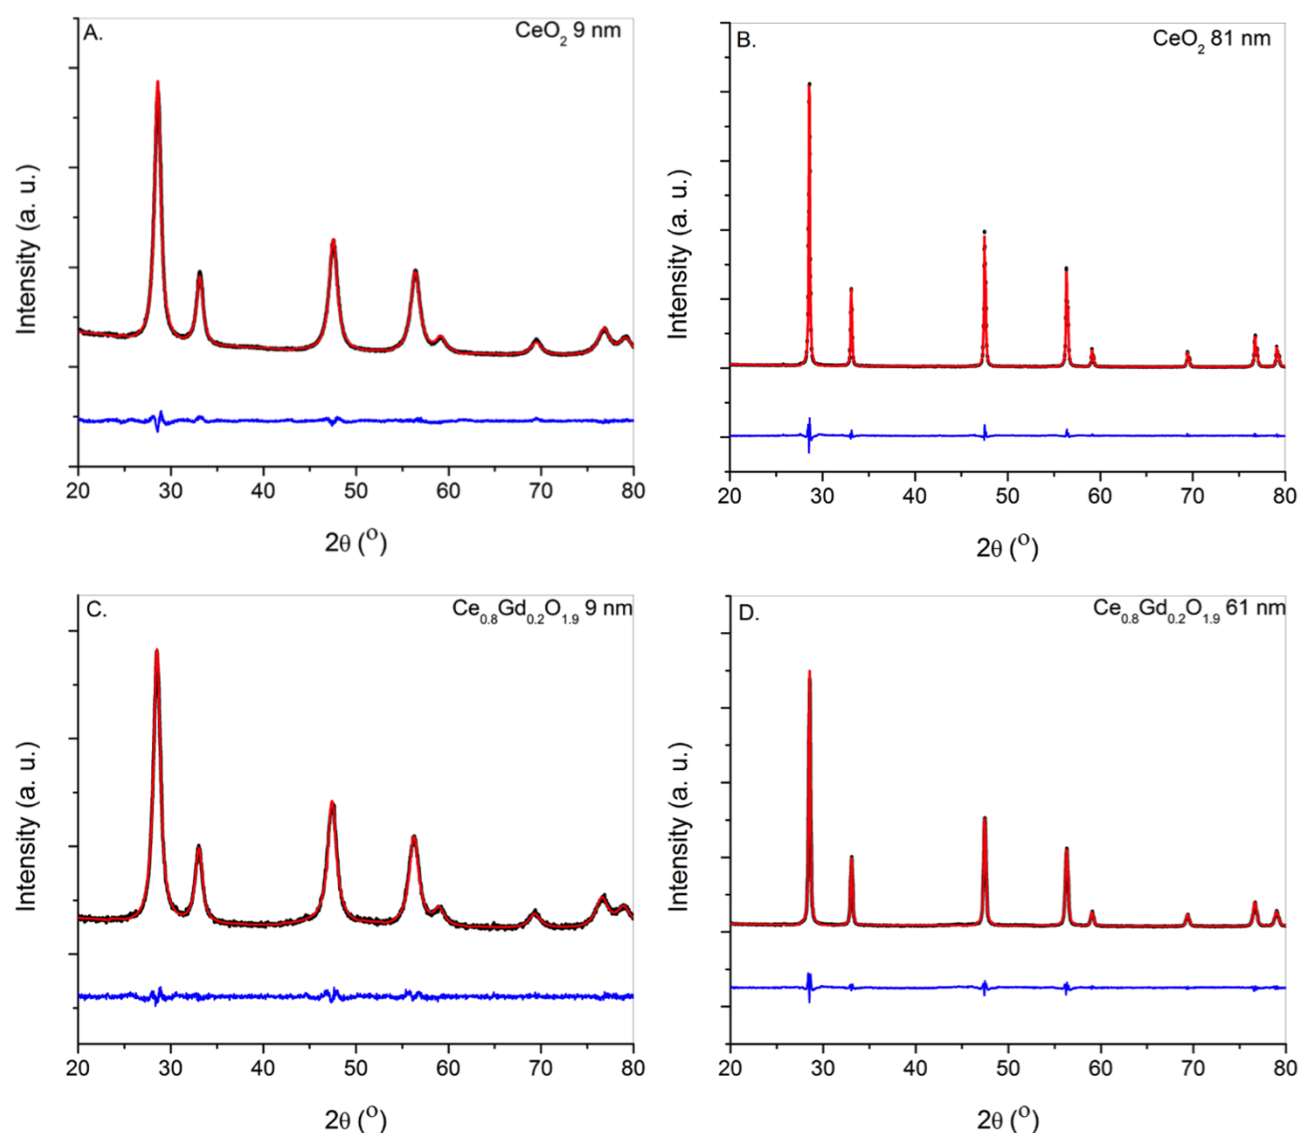

Figure S 1 Structural characterization obtained from X-Ray diffraction (Cu K $\alpha$ 1,2 radiation). Structural characterization of: A. NCEO, B. BCEO, C. NCGO and D. BCEO. Rietveld Refinement (using FullProf software) of the patterns has been included in the figure. The black solid lines and overlying red patterns indicate the observed and calculated intensities. The difference between the observed and calculated profiles is plotted at the bottom in blue; Refinement parameters in the table below:

| Sample | lattice parameter (Å) | crystalline size [nm] | $R_{\text{Bragg}}$ | $R_{\text{f}}$ | $\chi^2$ | space group |
|--------|-----------------------|-----------------------|--------------------|----------------|----------|-------------|
| BCEO   | $a = 5.409$           | 81                    | 0.798              | 0.563          | 5.15     | Fm-3m       |
| BCGO   | $a = 5.417$           | 61                    | 1.85               | 0.933          | 4.57     | Fm-3m       |
| NCEO   | $a = 5.410$           | 9                     | 0.830              | 0.614          | 2.71     | Fm-3m       |
| NCGO   | $a = 5.422$           | 9                     | 0.687              | 0.413          | 1.62     | Fm-3m       |

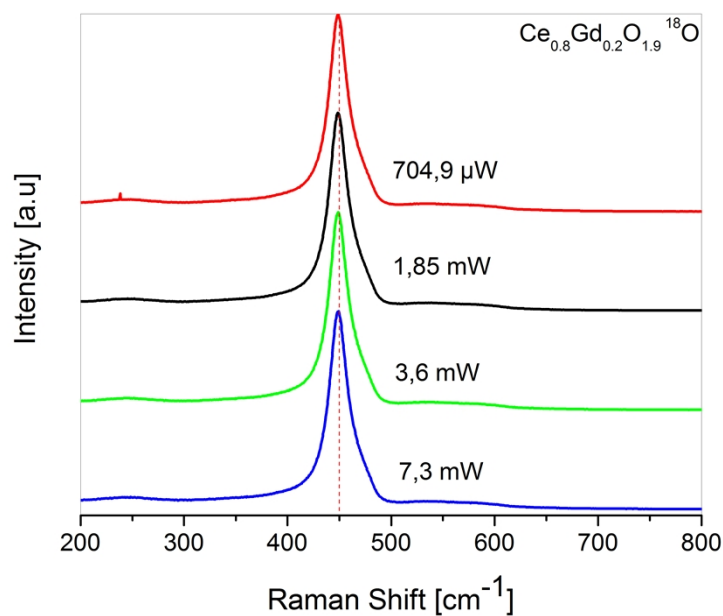

Figure S 2 Effect of the laser source power on the NCGO  $^{18}\text{O}$ .

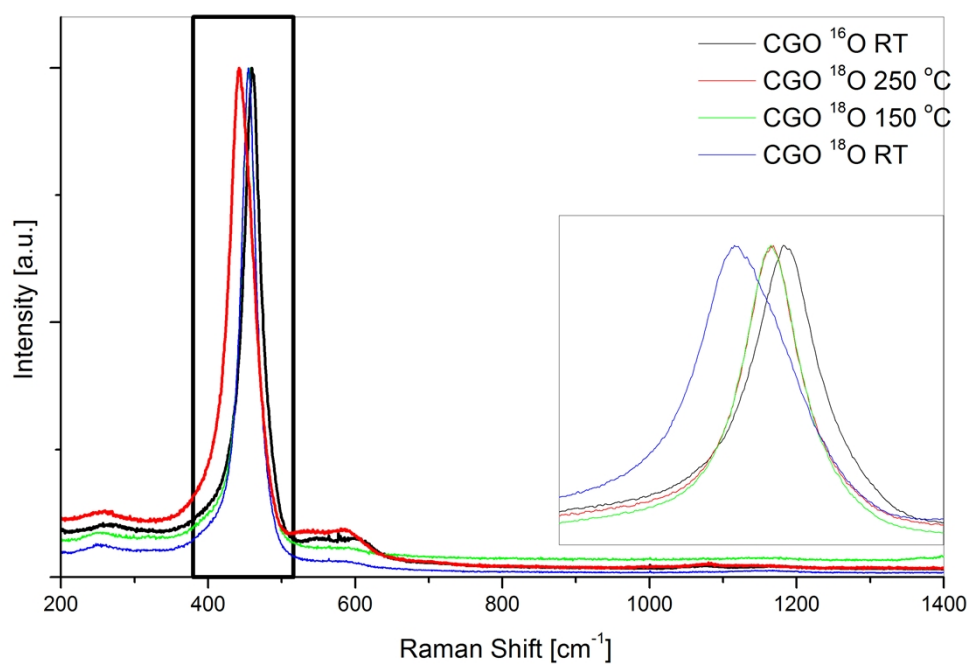

Figure S 3 Raman Spectra taken a RT on the NCGO  $^{16}\text{O}$ , NCGO  $^{18}\text{O}$  and Ex-Situ preheated NCGO  $^{18}\text{O}$  at 250 $^{\circ}\text{C}$

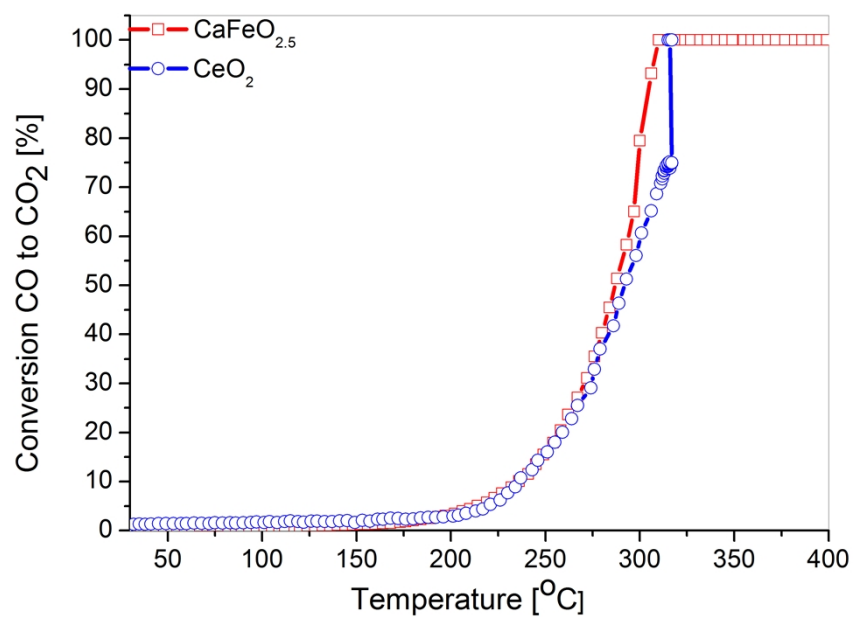

Figure S 4 CO oxidation over CeO<sub>2</sub> (blue line) and CaFeO<sub>2.5</sub> (red line).

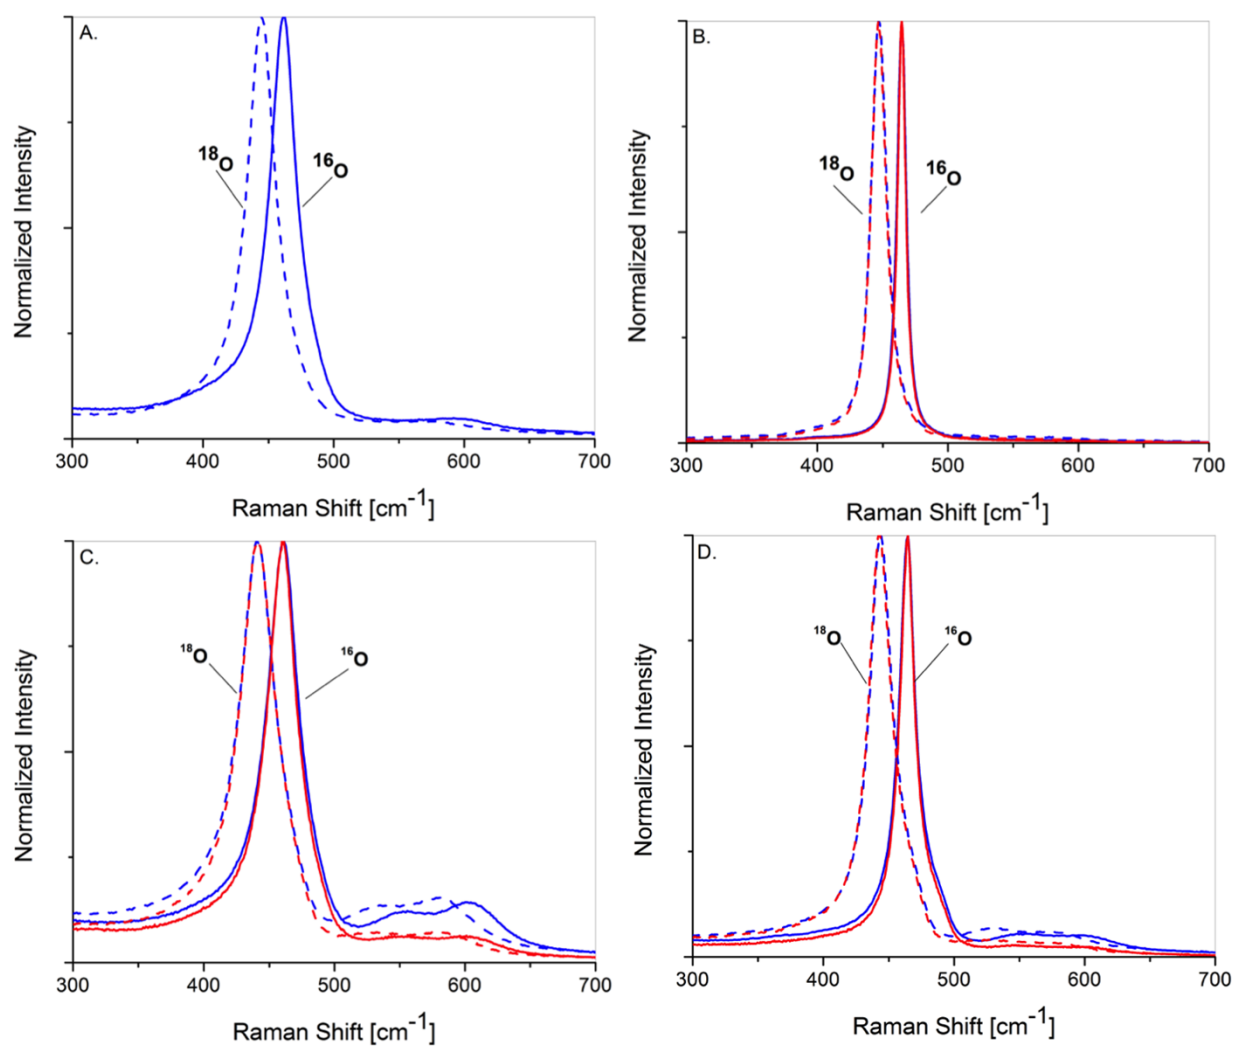

Figure S 5 Normalized Raman Spectra of: A. NCE $^{18}\text{O}$ ; B. BCE $^{18}\text{O}$ ; C. NCG $^{18}\text{O}$ ; D. BCG $^{18}\text{O}$ . Red lines stand for HeNe laser source, whereas blue lines indicate D473 laser source. Solid lines mark samples containing  $^{16}\text{O}$  and dashed lines mark samples containing  $^{18}\text{O}$ .
